# Supplementary material for: Heterogeneous electro-Fenton treatment of clofibric acid with an Fe₃O₄-loaded bifunctional carbon felt cathode via different anode types
Source: Research Square preprint supplement (doi:10.21203/rs.3.rs-6965557/v1), 2025-10-23
Supplement: Supplementary file 1 [file 0c923f68a9097aed5c54b40c.docx]

*Supplementary Material*

**Heterogeneous electro-Fenton treatment of clofibric acid with a Fe3O4 loaded bifunctional carbon felt cathode via different anode types**

**Titus Otamayomi Moses, Doğan Çirmi, Yalçın Fidan, Belgin Gözmen***

*Department of Chemistry, Faculty of Science, Mersin University, Mersin 33342, Turkey*

** Corresponding author*

*E-mail addresses:* bgozmen@mersin.edu.tr (B. Gözmen)

**Text S1- Experimental**

**Text S1.1 Chemicals used**

Commercial Clofibric acid (2-(p-Chlorophenoxy)-2-methylpropionic acid, 97%), Poly(ethylene glycol)-block-poly(propylene glycol)- (PEG-PPG-PEG* Pluronic P-123, Mn ~ 5800), and Para-Benzoquinone (pBQ, ≥ 99.5%), Ethyleneglycol (EG, ≥ 99.5%), and Platinum gauze electrode (10 cm2) were obtained from Sigma-Aldrich (Germany). Iron(III) chloride (FeCl3, ≥ 98%), Sodium acetate trihydrate (CH3COONa⋅3H2O, ≥ 99%), Tert-butyl alcohol (TBA, ≥ 99%), Ethanol (EtOH, ≥ 99.9%), Sodium sulphate (Na2SO4, ≥ 99%), Potassium hydrogen phthalate (C8H5KO4, EMSURE), Sodium carbonate (Na2CO3, EMSURE), and Ferrous (II) sulfate (FeSO4⋅7H2O) were supplied by Merck (Germany). Iron(II) chloride (FeCl2, 99%) was supplied by Alfa Aesar (USA). Carbon felt (4 cm × 8 cm × 0.5 cm) was supplied by Carbone Lorraine (France). Boron doped diamond (BDD, 5 cm × 5 cm) electrode was purchased from Condias GmbH (Germany).

**Text S1.2 Preparation of CF@Fe3O4 cathode and characterization**

Synthesis of CF@Fe3O4 was carried out by modifying the method developed by Dung et al. [27]. After being cleaned using EtOH, ultrapure water, and acetone, the carbon felt was submerged in a 65% HNO3 solution and activated for 9 h at 90°C. The cleaning process was repeated. 2 g of Pluronic P-123 was added to 50 mL of EG and mixed well to dissolve (A solution). 0.3244 g of FeCl3 and 0.1267 g of FeCl2 were dissolved in 25 mL of EG (B solution). Finally, 6.8 g of CH3COONa was dissolved in 25 mL of EG. CF was placed in solution A and stirred for a while, then solutions B and C were added dropwise to solution A, respectively. Then, the mixture was transferred to a teflon-lined stainless steel reactor and kept at 180 °C for 12 h. After the solvothermal reaction concluded, the autoclave was allowed to cool spontaneously to ambient temperature. The CF@Fe3O4 electrode was washed to remove unreacted precursors and by-products. The electrode was dried in an oven at 60 °C to provide the Fe3O4-loaded carbon felt electrode (CF@Fe3O4). CF@Fe3O4 surface analysis was carried out by Field Emission Scanning Electron Microscope (FE SEM, Zeiss Supra 55). X-ray diffraction of powdered Fe3O4 NPs was performed using a Rigaku Smartlab model XRD device (Cu-Kα) in the range of 5-80° at a scanning speed of 4° min−1.

**Text S1. 3 Electrochemical characterizations of CF@Fe3O4 cathode**

The oxygen reduction reaction (ORR) performance of the cathode was assessed in a 0.1 M Na2SO4 electrolyte saturated with either O₂ or N2. A three-electrode setup was employed, consisting of an Ag/AgCl reference electrode, a platinum plate counter electrode (2 × 2 cm), and a Fe3O4 -coated carbon felt (CF) working electrode (1 × 2 cm). All electrochemical measurements were carried out at 25 °C using a CHI660A electrochemical workstation (CH Instruments). Cyclic voltammetry (CV) analyses were performed within a potential range of –1.2 V to 1.2 V versus Ag/AgCl at a scan rate of 10 mV/s. Electrochemical impedance spectroscopy (EIS) measurements were subsequently conducted by applying a 5 mV AC amplitude over a frequency range spanning from 0.1 Hz to 100 kHz.

**Text S1. 4 Homogeneous and heterogeneous electro-Fenton systems and analysis**

The electrochemical degradation experiments were conducted in an electrolytic cell using a laboratory DC power supply to apply controlled currents of 50 mA, 100 mA, and 300 mA. Electro-Fenton (EF) processes were carried out using Pt and BDD anode in response to the CF@Fe3O4 electrode in the electrolytic cell. The distance between the electrodes was kept 2 cm. For EF treatments, 200 mL of a 0.23 mM CFA solution was utilized. O2 gas was passed through the solution for 15 min before electrical current was applied in the EF process. 50 mM Na2SO4 was added as the electrolyte. The pH of the solution was adjusted using either 0.3 M H2SO4 or 0.3 M NaOH solutions. Samples were collected at intervals times for HPLC analysis. Samples taken for total organic carbon (TOC) analysis were taken through a 0.2 μm PTFE filter. In the experiments carried out using the same sized CF electrode for control purposes, 0.1 mM FeSO4 was added to the solution while the pH was adjusted to 3.0. The reactive oxygen species that were effective in oxidizing clofibric acid were identified using pBQ (10 mM), TBA (1 M), and EtOH (1 M) radical scavengers.

**Text S1. 5 Analytical Procedure**

Clofibric acid (CFA) concentration was monitored by HPLC (Agilent 1200, USA) analysis at 230 nm using a DAD detector and ACE C18 reverse phase column (10 ×250 mm, particle size 5 μm). A mixture of 40 % (v/v) acetonitrile and 60 % (v/v) ultrapure water (containing 50 mL of MeOH and 4 mL of H3PO4 in 1 liter) was used as the mobile phase at a flow rate of 0.6 mL/min. Clofibric acid degradation was expressed as the ratio of the concentration at time t (Ct) to the initial concentration (C0). The pseudo-first-order rate constant (*kapp*) for the oxidation of CFA by •OH radicals in the EF process was calculated using Eq. (1) [42].

(1)

Mineralization of CFA aqueous solution was monitored with TOC analyzer (Shimadzu TOC-L, Japan). Non-Purgeable Organic Carbon (NPOC) was determined in the method based on determination of CO2 gas formed after combustion at 680 °C on the platinum catalyst surface with NDIR detector. Potassium hydrogen phthalate and sodium carbonate were used for calibration. Mineralization efficiency was calculated using Eq. (2) using the TOC value of the initial (*TOC0*) and post-treatment (*TOCt*) solutions.

(2)

The mineralization current efficiency (MCE) was calculated using the removal of TOC (mg C L−1) value due to applied current and time following Eq. (3) [25].

(3)

Here, m is the number of carbon atoms in CFA, *I* is the applied current (A), *t* is the electrolysis time (h), *V* is the solution volume (L), *Δ(TOC)exp* is the experimental TOC decay (mg L−1), and 4.32 × 107 is a unit conversion factor, *F* is the Faraday constant (96485 C mol−1), and n is the number of electrons it consumes per mole to mineralize the target molecule.

The mineralization of CFA (C10H11ClO3) into CO2 and Cl- ions occurs with the transfer of 44 electrons, as shown in Eq. (4).

C10H11ClO3 + 17H2O → 10CO2 + Cl− + 45H+ + 44e− (4)

**Table S1.** The apparent rate constant and correlation coefficient and MCE values ​​obtained depending on the applied current with different anode/cathode pairs used in CFA oxidation

|  | kapp (min-1)  (R2) | | | MCE (%)  3 / 5 h | | |
| --- | --- | --- | --- | --- | --- | --- |
| Current  Cathode / Anode | 50 mA | 100 mA | 300 mA | 50 mA | 100 mA | 300 mA |
| CF / Pt | 0.1184  (0.9951) | 0.0789 (0.9989) | 0.0469 (0.9946) | 27.2 / 19.3 | 5.9 / 4.9 | 1.2 / 1.6 |
| CF@Fe3O4 / Pt | 0.2266 (0.9983) | 0.1717 (0.9953) | 0.0695 (0.9785) | 29.2 / 19.5 | 10.8 / 8.3 | 1.7 / 2.0 |
| CF@Fe3O4/ BDD | 0.2389 (0.9973) | 0.1020 (0.9967) | 0.0484 (0.9959) | 32.7 / 22.2 | 18.1 / 12.1 | 6.2 / 4.2 |
